# Supplementary material for: Solvent-mediated directionally self-assembling MoS2 nanosheets into a novel worm-like structure and its application in sodium batteries
Source: Royal Society of Chemistry journal article supplement (doi:10.1039/c5ta00315f), 2015-01-01
Supplement: c5ta00315f1.pdf [file c5ta00315f1.pdf]

## Supporting information:

**Title:** Solvent-mediated directionally self-assembling MoS<sub>2</sub> nanosheets to a novel worm-like structure and its application in sodium batteries

Maowen Xu<sup>a,b,\*†</sup>, FengLian Yi<sup>a,b, †</sup>, Yubin Niu<sup>a,b</sup>, Jiale Xie<sup>a,b</sup>, Junke Hou<sup>a,b</sup>, Chuanjun Cheng<sup>a,b</sup>, Sangui Liu<sup>a,b</sup>, Weihua Hu<sup>a,b</sup>, Yutao Li<sup>c</sup>, Chang Ming Li<sup>a,b,\*</sup>

## Affiliation:

<sup>a</sup>Institute for Clean Energy & Advanced Materials, Faculty of Materials and Energy, Southwest University, Chongqing 400715, P.R. China

<sup>b</sup>Chongqing Key Laboratory for Advanced Materials and Technologies of Clean Energies, Chongqing 400715, P.R. China

<sup>c</sup>Texas Materials Institute, University of Texas at Austin, Texas 78712, USA

Corresponding authors\* *E-mail:* [ecmli@swu.edu.cn](mailto:ecmli@swu.edu.cn)

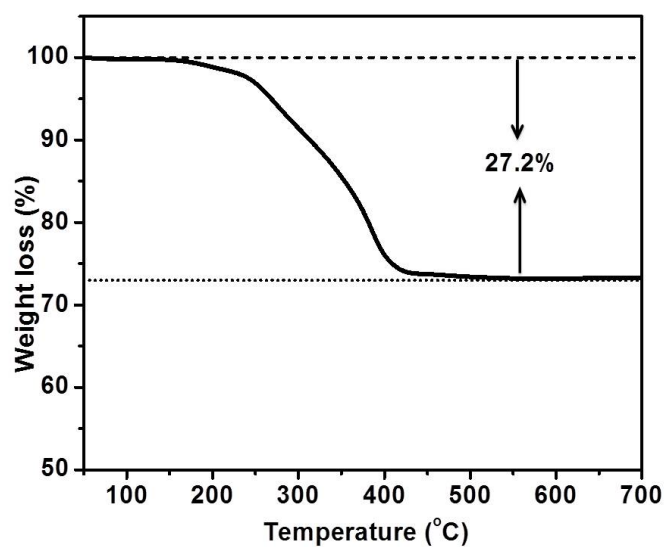

Figure S1. TGA analysis of the octylamine in the prepared samples in air at a heating rate of  $5^{\circ}\text{C min}^{-1}$  to  $700^{\circ}\text{C}$ .

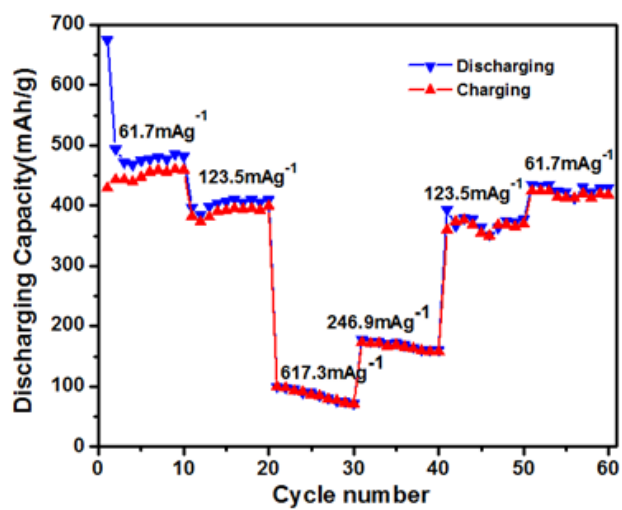

Figure S2. Rate capability of the worm-like  $\text{MoS}_2$ .
